# Supplementary material
Source: publisher site journal article supplement (https://neobiota.pensoft.net/article/83342/download/suppl/31/)
Supplement: Supplementary file 1

# Supplementary material

**Supplementary Table S1.** The plant species' functional traits that influence seed dispersal by bird species as identified in Bitani et al. (2020).

| **Family** | **Plant species** | **Origin** | **Habit** | **Mean fruit size (mm)** | **Mean seed size (mm)** | **Mean crop size (mm)** | **Reference** |
| --- | --- | --- | --- | --- | --- | --- | --- |
| [Simaroubaceae](https://www.google.com/search?sxsrf=ALiCzsY1WjdcHRmIe_zO3tu-IxoaBeXf_g:1653579175052&q=Simaroubaceae&stick=H4sIAAAAAAAAAONgVuLUz9U3MDO2KM5dxMobnJmbWJRfmpSYnJqYCgBdZM_SHQAAAA&sa=X&ved=2ahUKEwiG09i6vv33AhWIOcAKHXeGBgsQmxMoAXoFCIgBEAM) | *Ailanthus altissima* | Asia | Tree | 5.7 | 4 | 325000 | Henderson (2001);  Bitani et al. (2020) |
| [Primulaceae](https://www.google.com/search?sxsrf=ALiCzsbAPDflwA0pO6VGvjfav-BwuuGNZw:1653580478491&q=Primulaceae&stick=H4sIAAAAAAAAAONgVuLUz9U3MEopMipfxModUJSZW5qTmJyamAoAN7_H-xsAAAA&sa=X&ved=2ahUKEwi6jpyow_33AhVph_0HHS29AggQmxMoAXoECF8QAw) | *Ardisia crenata* | Asia | Shrub | 8.4 | 5.4 | 1200 | Bitani et al. (2020) |
| Solanaceae | *Cestrum laevigatum* | South America | Shrub/ Tree | 5.63 | 2.36 | - | Jordaan & Downs (2012) |
| Lauraceae | *Cinnamomum camphor* | East Asia | Tree | 8 | 6.5 | 100000 | Bitani et al. (2020) |
| Verbenaceae | *Duranta erecta* | America | Shrub | 7 | 3.5 | 25325 | Bitani et al. (2020) |
|  | *Lantana camara* | South America | Shrub | 4 | 3 | 856 | Bitani et al. (2020) |
| [Myrtaceae](http://en.wikipedia.org/wiki/Myrtaceae) | *Eugenia uniflora* | South America | Shrub/Tree | 20 | 7 | 180 | Blendinger et al. (2016) |
|  | *Psidium guajava* | America | Tree | 45.2 | 2.4 | 276 | Bitani et al. (2020) |
|  | *Syzigium jambos* | Asia | Tree | 37 | 18 | 726 | Corlett (2005) |
| Meliaceae | *Melia azedarach* | Asia-Australia | Tree | 11.9 | 9 | 14756 | Bitani et al. (2020) |
| Moraceae | *Morus alba* | Tree | Tree | 9.1 | 1.8 | 86000 | Bitani et al. (2020) |
| Euphorbiaceae | *Ricinus communis* | Africa | Shrub | 20 | 7 | 84 | Bitani et al. (2020) |
| Rosaceae | *Rubus cuneifolius* | America | Shrub | 10 | 2.1 | 100 | Chapelka (2002) |
| [Anacardiaceae](https://www.google.com/search?sxsrf=ALiCzsZTxXzZPzDZutIRQyEoY7SrW3ndww:1653580023823&q=Anacardiaceae&stick=H4sIAAAAAAAAAONgVuLQz9U3yDI0KFnEyuuYl5icWJSSmZicmpgKAJqWgUocAAAA&sa=X&ved=2ahUKEwiavbXPwf33AhXVRfEDHY_CCsAQmxMoAXoECHAQAw) | *Rhus*/*Toxicodendron succedanea* | Asia | Tree | 9 | 4.17 | - | Henderson (2001); Otani & Shibata (2000) |
|  | *Schinus terebinthifolius* | South America | Shrub/Tree | 1 | 2.9 | 10000 | Bitani et al. (2020) |
| Solanaceae | *Solanum mauritianum* | South America | Shrub | 13.7 | 2 | 150000 | Bitani et al. (2020) |

**Supplementary Table S2.** References used for the data summarised in Table S2

Anderson, M., & Crosby, M.K. (2018). An assessment of invasive plants on Shorter University’s campus. *Mathematical and Computational Forestry & Natural Resource Sciences*, 10, 24-29.

Aravind, N.A., Rao, D., Ganeshaiah, K.N., Shaanker, R.U., & Poulsen, J.G. (2010). Impact of the invasive plant, *Lantana camara*, on bird assemblages at Male Mahadeshwara Reserve Forest, South India. *Tropical Ecology*, 51, 325-338.

Atkinson, J.T., Ismail, R., & Robertson, M., (2014). Mapping bugweed (*Solanum mauritianum*) infestations in *Pinus patula* plantations using hyperspectral imagery and support vector machines. *IEEE Journal of Selected Topics in Applied Earth Observations and Remote Sensing*, 7, 17-28.

Avalos, G., Hoell, K., Gardner, J., Anderson, S., & Lee, C. (2006). Impact of the invasive plant *Syzigium jambos* (Myrtaceae) on patterns of understory seedling abundance in a Tropical Premontane Forest, Costa Rica. *Revista de Biología Tropical*, 54, 415-421.

Barbosa, J.D., Oliveira, C.M.C., Pinheiro, C., Lopes, C.T., Marquiore, D., Brito, M.D.F., Yamasaki, E.M., & Tokarnia, C.H. (2010). Intoxicação por *Cestrum laevigatum* (Solanaceae) em bubalinos. *Pesquisa Veterinária Brasileira, Rio de Janeiro*, 30, 1049-1052.

Bhagwat, S.A., Breman, E., Thekaekara, T., Thornton, T.F., & Willis, K.J. (2012). A battle lost? Report on two centuries of invasion and management of *Lantana camara* L. in Australia, India and South Africa. *PLoS One*, 7, e32407.

Burgess, K.S., Morgan, M., Deverno, L., & Husband, B.C. (2005). Asymmetrical introgression between two *Morus* species (*M. alba*, *M. rubra*) that differ in abundance. *Molecular Ecology*, 14, 3471-3483.

Call, L.J., & Nilsen, E.T. (2005). Analysis of interactions between the invasive tree-of-heaven (*Ailanthus altissima*) and the native black locust (*Robinia pseudoacacia*). *Plant Ecology*, 17,275-285.

Campbell, P.L., & Van Staden, J. (1983). Germination of seeds of *Solanum mauritianum*. *South African Journal of Botany*, *2*, 301-304.

Casella, F., & Vurro, M. (2013). *Ailanthus altissima* (tree of heaven): Spread and harmfulness in a case-study urban area. *Arboricultural Journal: The International Journal of Urban Forestry*, 35: 172-181.

Castro Díez, M.P., & Alonso Fernández, Á. (2017). Effects of non-native riparian plants in riparian and fluvial ecosystems: a review for the Iberian Peninsula. *Limnetica*, 36, 525-541.

Constán-Nava, S., Soliveres, S., Torices, R., Serra, L., & Bonet, A. (2015). Direct and indirect effects of invasion by the alien tree *Ailanthus altissima* on riparian plant communities and ecosystem multifunctionality. *Biological Invasions*, 17, 1095-1108.

Copeland, R.S., & Wharton, R.A., 2006. Year-round production of pest *Ceratitis* species (Diptera: Tephritidae) in fruit of the invasive species *Solanum mauritianum* in Kenya. *Annals of the Entomological Society of America*, 99, 530-535.

Coutinho, T.A., Wingfield, M.J., Alfenas, A.C., & Crous, P.W. (1998). Eucalyptus rust: A disease with the potential for serious international implications. *Plant Disease*, 82, 819-825.

Davies, J.N., & Boulton, A.J. (2009). Great house, poor food: effects of exotic leaf litter on shredder densities and caddisfly growth in 6 subtropical Australian streams. *Journal of the North American Benthological Society*, 28, 491-503.

Denny, R.P., & Goodall, J.M. (1991). Variable effects of glyphosate and triclopyr used for the control of American bramble, *Rubus cuneifolius* agg, in pine plantations. *South African Forestry Journal*, 159, 11-15.

Donnelly, M.J., Green, D.M., Walters, L.J. (2008). Allelopathic effects of fruits of the Brazilian pepper *Schinus terebinthifolius* on growth, leaf production and biomass of seedlings of the red mangrove *Rhizophora mangle* and the black mangrove *Avicennia germinans*. *Journal of Experimental Marine Biology and Ecology*, 357, 149-156.

Erasmus, D.J., & Van Staden, J. (1983). Seasonal translocation of assimilates in the weed, *Rubus cuneifolius*. *South African Journal of Botan*y, 2, 187-190.

Erasmus, D.J., & van Staden, J. (1984). The effect of leaf age and decapitation of the cane apex on the translocation of assimilates in the weed, *Rubus cuneifolius*. *South African Journal of Botany,* 3, 33-37.

Ewel, J., D. Ojima, D. Karl, & W. Debusk (1982). *Schinus* in successional ecosystems of Everglades National Park. South Florida Res. Cent. Rep. T-676. Everglades National Park, National Park Service, Homestead, Florida.

Ewe, S.M., & da L, S. (2002). Seasonal water-use by the invasive exotic, *Schinus terebinthifolius*, in native and disturbed communities. *Oecologia*, 133, 441-448.

Glen, M., Alfenas, A.C., Zauza, E.A.V., Wingfield, M.J., & Mohammed, C. (2007). *Puccinia psidii*: A threat to the Australian environment and economy—a review. *Australasian Plant Pathology*, 36, 1-16.

Goulson, D., & Derwent, L.C. (2004). Synergistic interactions between an exotic honeybee and an exotic weed: pollination of *Lantana camara* in Australia. *Weed Research*, 44, 195-202.

Gómez‐Aparicio, L., & Canham, C.D. (2008). Neighbourhood analyses of the allelopathic effects of the invasive tree *Ailanthus altissima* in temperate forests. *Journal of Ecology*, 96, 447-458.

Gutiérrez-López, M., Ranera, E., Novo, M., Fernández, R., & Trigo, D. (2014). Does the invasion of the exotic tree *Ailanthus altissima* affect the soil arthropod community? The case of a riparian forest of the Henares River (Madrid). *European Journal of Soil Biology*, 62, 39-48.

Hansen, S., Roets, F., Seymour, C.L., Thébault, E., van Veen, F.F., & Pryke, J.S. (2018). Alien plants have greater impact than habitat fragmentation on native insect flower visitation networks. *Diversity and Distributions*, 24, 58-68.

Hedström, I. (1992). Why do guava fruit flies, *Anastrepha striata* (Tephritidae), avoid the upper canopy of host trees*? Tropical Pest Management*, 38, 136–143.

Heisey, R.M. (1990). Allelopathic and herbicidal effects of extracts from tree of heaven (*Ailanthus altissima*). *American Journal of Botany*, 77, 662-670.

Heisey, R.M. (1996). Identification of an allelopathic compound from *Ailanthus altissima* (Simaroubaceae) and characterization of its herbicidal activity. *American Journal of Botany*, 83,192-200.

Hight, S.D., Horiuchi, I., Vitorino, M.D., Wikler, C., & Pedrosa-Macedo, J.H., 2003. Biology, host specificity tests, and risk assessment of the sawfly *Heteroperreyia hubrichi*, a potential biological control agent of *Schinus terebinthifolius* in Hawaii. *BioControl*, 48, 461-476.

Holmes, P. M., Richardson, D. M., Esler, K. J., Witkowski, E. T. F., & Fourie, S. (2005). A decision-making framework for restoring riparian zones degraded by invasive alien plants in South Africa. *South African Journal of Science*, 101, 553-564.

Jensen, W.I., & Allen, J.P. (1981). Naturally occurring and experimentally induced castor bean (*Ricinus communis*) poisoning in ducks. *Avian Diseases*, 25, 184-194.

Johnson, A., & Johnson, S. (2006). *Garden plants poisonous to people*. State of New South Wales: NSW Department of Primary Industries.

Kanowski, J., Catterall, C.P., & Neilan, W. (2008). Potential value of weedy regrowth for rainforest restoration. *Ecological Management & Restoration*, 9, 88-99.

Kaufman, W., & Kaufman, S.R. (2013). *Invasive plants: guide to identification and the impacts and control of common North American species* (2nd ed.) Mechanicsburg: Stackpole Books.

Kohli, R.K., Batish, D.R., Singh, H.P., & Dogra, K.S. (2006). Status, invasiveness and environmental threats of three tropical American invasive weeds (*Parthenium hysterophorus L*., *Ageratum conyzoides L*., *Lantana camara* L.) in India. *Biological Invasions*, 8, 1501-1510.

Kitajima, K., Fox, A.M., Sato, T., & Nagamatsu, D. (2006). Cultivar selection prior to introduction may increase invasiveness: Evidence from *Ardisia crenata*. *Biological Invasions*, 8, 1471-1482.

Kowarik, I., & Säumel, I. (2007). Biological flora of central Europe: *Ailanthus altissima* (Mill.) swingle. *Perspectives in Plant Ecology, Evolution and Systematics*, 8, 207-237.

Lawrence, J.G., Colwell, A., & Sexton, O.J (1991). The ecological impact of allelopathy in *Ailanthus altissima* (Simaroubaceae). *American Journal of Botany*, 78, 948-958.

Leite, S.A., Castellani, M.A., Ribeiro, A.E.L., Costa, D.R.D., Bittencourt, M.A.L., & Moreira, A.A., 2017. Fruit flies and their parasitoids in the fruit growing region of Livramento de Nossa Senhora, Bahia, with records of unprecedented interactions. *Revista Brasileira de Fruticultura*, 39, e542

Magagula, C. N., & Ntonifor, N. (2014). Species composition of fruit flies (Diptera: Tephritidae) in feral guavas (*Psidium guajava* Linnaeus) and marula (*Sclerocarya birrea (*A. Richard) Hochstetter) in a subsistence savanna landscape: Implications for their control. *African Entomology*, 22, 320–329.

Mavimbela, L.Z., Sieben, E.J., & Procheş, Ş. (2018). Invasive alien plant species, fragmentation and scale effects on urban forest community composition in Durban, South Africa. *New Zealand Journal of Forestry Science*, 48, 19.

Mayfield III, A.E., Crane, J.H., & Smith, J.A., 2008. *Laurel wilt*: a threat to redbay, avocado and related trees in urban and rural landscapes. Florida: *University of Florida Ext. Publ. HS1137*.

Medina-Villar, S., Rodríguez-Echeverría, S., Lorenzo, P., Alonso, A., Pérez-Corona, E., & Castro-Díez, P. (2016). Impacts of the alien trees *Ailanthus altissima* (Mill.) Swingle and *Robinia pseudoacacia* L. on soil nutrients and microbial communities. *Soil Biology and Biochemistry*, 96, 65-73.

Mokotjomela, T.M., Musil, C.F., & Esler, K.J. (2016). An appraisal of seed enumeration and videographic techniques for determining seed removal rates by birds. *African Journal of Ecology*, 54, 281-288.

Morgan, E.C., & Overholt, W.A. (2005). Potential allelopathic effects of Brazilian pepper (*Schinus terebinthifolius* Raddi, Anacardiaceae) aqueous extract on germination and growth of selected Florida native plants. *Journal of the Torrey Botanical Society*, 132, 11-15.

Morton, J.F. (1978). Brazilian pepper—its impact on people, animals and the environment*. Economic Botany*, 32, 353-359.

Motard, E., Muratet, A., Clair-Maczulajtys, D., & Machon, N. (2011). Does the invasive species *Ailanthus altissima* threaten floristic diversity of temperate peri-urban forests? *Comptes Rendus Biologies*, 334, 872-879.

Nanjappa, H.V., Saravanane, P., & Ramachandrappa, B.K. (2005). Biology and management of *Lantana camara* L.-A review. *Agricultural Reviews-Agricultural Research Communications Centre India*, 26, 272.

Ndlovu, P., Mutanga, O., Sibanda, M., Odindi, J., & Rushworth, I. (2018). Modelling potential distribution of bramble (*Rubus cuneifolius*) using topographic, bioclimatic and remotely sensed data in the KwaZulu-Natal Drakensberg, South Africa. Applied Geography 99: 54-62.

Nentwig, W., Mebs, D., & Vilà, M. (2017). Impact of non-native animals and plants on human health. In: Vilà, M. & Hulme, P.E. (Eds.), *Impact of Biological Invasions on Ecosystem Services* Vol.12. Cham: Springer, pp. 277-293.

Nilsen, E., Huebner, C., Carr, D., & Bao, Z. (2018). Interaction between *Ailanthus altissima* and native *Robinia pseudoacacia* in early succession: Implications for forest management. *Forests*, 9, 221.

Noble, A.D., Zenneck, I., & Randall, P.J. (1996). Leaf litter ash alkalinity and neutralisation of soil acidity. *Plant and Soil*, 179, 293-302.

Novak, N., Novak, M., Barić, K., Šćepanović, M., & Ivić, D. (2018). Allelopathic potential of segetal and ruderal invasive alien plants. *Journal of Central European Agriculture*, 19, 408-422.

Olckers, T. (2009). *Solanum mauritianum* Scopoli (Solanaceae) In R. Muniappan & A. Raman (Eds) Biological Control of Tropical Weeds using Arthropods. Cambridge: Cambridge Univesity Press.

Osunkoya, O.O., & Perrett, C. (2011). *Lantana camara* L. (Verbenaceae) invasion effects on soil physicochemical properties. *Biology and Fertility of Soils*, 47, 349-355.

Panetta, F.D., & McKee, J. (1997). Recruitment of the invasive ornamental, *Schinus terebinthifolius*, is dependent upon frugivores. *Australian Journal of Ecology*, 22, 432-438.

Peerbhay, K., Mutanga, O., Lottering, R.& Ismail, R. (2016). Mapping *Solanum mauritianum* plant invasions using WorldView-2 imagery and unsupervised random forests. *Remote Sensing of Environment*, 182*,* 39-48.

Pegg, G.S., Giblin, F.R., McTaggart, A.R., Guymer, G.P., Taylor, H., Ireland, K.B., Shivas, R.G., Perry, S. (2014). *Puccinia psidii* in Queensland, Australia: Disease symptoms, distribution and impact.*Plant Pathology*, 63, 1005-1021.

Pessoa, C.R., Medeiros, R.M., & Riet-Correa, F. (2013). Economic impact, epidemiology and control poisonous plants in Brazil. *Pesquisa Veterinária Brasileira*, 33, 752-758.

Phua, D.H., Tsai, W.J., Ger, J., Deng, J.F. and Yang, C.C. (2008). Human *Melia azedarach* poisoning. *Clinical Toxicology*, 46, 1067-1070

Priyanka, N., & Joshi, P.K. (2013). A review of *Lantana camara* studies in India. *International Journal of Scientific and Research Publications*, 3, 1-11.

Rademaker, M., & Duffill, M.B. (1995). Allergic contact dermatitis to *Toxicodendron succedaneum* (rhus tree): an autumn epidemic.  *New Zealand Medical Journal*, 108, 121-123.

Rajah, P., Odindi, J., & Mutanga, O. (2018). Evaluating the potential of freely available multispectral remotely sensed imagery in mapping American bramble (*Rubus cuneifolius*). *South African Geographical Journal*, 100, 291-307.

Samways, M.J., Caldwell, P.M., & Osborn, R. (1996). Ground-living invertebrate assemblages in native, planted and invasive vegetation in South Africa. *Agriculture, Ecosystems & Environment*, 59*,* 19-32.

Sanders, R.W. (2006). Taxonomy of *Lantana* sect. *Lantana* (Verbenaceae): I. correct application of *Lantana camara* and associated names. *Sida, Contributions to Botany*, 22, 381-421.

Shackleton, R.T., Witt, A.B., Aool, W., & Pratt, C.F. (2017). Distribution of the invasive alien weed, *Lantana camara*, and its ecological and livelihood impacts in eastern Africa. *African Journal of Range & Forage Science*, 34, 1-11.

Sharma, O.P., Sharma, S., Pattabhi, V., Mahato, S.B., & Sharma, P.D. (2007). A review of the hepatotoxic plant *Lantana camara*. *Critical Reviews in Toxicology*, 37, 313-352.

Sharma, G.P., & Raghubanshi, A.S. (2010). How lantana invades dry deciduous forest: A case study from Vindhyan highlands, India. *Tropical Ecology*, 51, 305-316.

Shaukat, A.S., & Siddiqui, I.A., (2001). *Lantana camara* in the soil changes the fungal community structure and reduces impact of *Meloidogyne javanica* on mungbean. *Phytopathologia Mediterranea*, 40, 245-252.

Singh, H.P., Batish, D.R., Dogra, K.S., Kaur, S., Kohli, R.K., & Negi, A. (2014). Negative effect of litter of invasive weed *Lantana camara* on structure and composition of vegetation in the lower Siwalik Hills, northern India. *Environmental Monitoring and Assessment*, 186, 3379-3389.

Stevens, J.T., & Beckage, B. (2009). Fire feedbacks facilitate invasion of pine savannas by Brazilian pepper (*Schinus terebinthifolius*). *New Phytologist*, 184, 365-375.

Sundaram, B., Krishnan, S., Hiremath, A.J., & Joseph, G. (2012). Ecology and impacts of the invasive species, *Lantana camara*, in a social-ecological system in South India: perspectives from local knowledge. *Human Ecology*, 40, 931-942.

Swanson, R.W., & Baranowski, R.M. (1972). Host range and infestation by the Caribbean fruit fly, *Anastrepha suspensa* (Diptera: Tephritidae). *South Florida Proceedings of the Florida State Horticultural Society*, 85, 271-274.

Swearingen, J., Slattery, B., Reshetiloff, K., & Zwicker, S. (2014). *Plant Invaders of Mid-Atlantic Natural Areas*, (5th ed). Washington, DC: National Park Service and U.S. Fish and Wildlife Service.

Tanner, T.L., 2000. *Rhus (toxicodendron*) dermatitis. *Primary Care: Clinics in Office Practice*, 27, 493-502.

Tessmann, D.J., Dianese, J.C., Miranda, A.C., & Castro, L.H.R., 2001. Epidemiology of a Neotropical rust (*Puccinia psidii*): Periodical analysis of the temporal progress in a perennial host (*Syzygium jambos*). *Plant Pathology*, 50, 725-731.

Tokarnia, C.H., Döbereiner, J., & Peixoto, P.V (2002). Poisonous plants affecting livestock in Brazil. *Toxicon*, 40, 1635-1660.

Tommerup, I.C., Alfenas, A.C., & Old, K.M. (2003). Guava rust in Brazil–a threat to Eucalyptus and other Myrtaceae. *New Zealand Journal of Forestry Science*, 33, 420-428.

Tye, A. (2001). Invasive plant problems and requirements for weed risk assessment in the Galapagos Islands. Weed risk assessment. In R.H. Groves, F.D. Panetta & Virtue, J.G. (Eds.), Weed Risk Assessment. Collingwood: CSIR Publishing

Van der Lugt, J.J., Nel, P.W., & Kitching, J.P. (1991). The pathology of *Cestrum laevigatum* (Schlechtd.) poisoning in cattle. *Onderstepoort Journal of Veterinary Research*, 58, 211-221.

Walker, G.A., Gaertner, M., Robertson, M.P., & Richardson, D.M. (2017). The prognosis for *Ailanthus altissima* (Simaroubaceae; tree of heaven) as an invasive species in South Africa; insights from its performance elsewhere in the world. *South African Journal of Botany*, 112, 283-289.

Witt, A.B., Kiambi, S., Beale, T., & Van Wilgen, B.W. (2017). A preliminary assessment of the extent and potential impacts of alien plant invasions in the Serengeti-Mara ecosystem, East Africa. *Koedoe*, 59, 1-16.

Worbs, S., Köhler, K., Pauly, D., Avondet, M.A., Schaer, M., Dorner, M.B., & Dorner, B.G. (2011). *Ricinus communis* intoxications in human and veterinary medicine—A summary of real cases. *Toxins*, 3, 1332-1372.
